# Supplementary material for: Reaching the cold regime: S(1D) + H2 and the role of long-range interactions in open shell reactive collisions
Source: Royal Society of Chemistry journal article supplement (doi:10.1039/c0cp02091e), 2011-01-01
Supplement: c0cp02091e.pdf [file c0cp02091e.pdf]

## The $S(^1D) + H_2(X^1\Sigma_g^+)$ interaction: long-range multipolar potentials

### I. LONG-RANGE ELECTROSTATIC ENERGIES

The electrostatic interaction between the permanent quadrupole moments of  $S(^1D)$  and  $H_2(X^1\Sigma_g^+)$  can be written as a  $5 \times 5$  potential matrix

$$V_{\lambda,\lambda'}^{\text{elec}}(R, \theta) = \frac{1}{R^5} C_5^{\lambda\lambda'} C_{2,\lambda'-\lambda}(\theta, 0), \quad (1)$$

where  $\lambda = 0, \pm 1, \pm 2$  is the projection of the atomic orbital angular momentum  $\mathbf{L}$  along the BF  $z$ -axis. According to Eq. 14 of the Appendix and the use of the Wigner-Eckart theorem, the electrostatic coefficients  $C_5^{\lambda\lambda'}$  take simple forms in terms of the atomic and diatomic quadrupole moments,  $\Theta_A = \langle L0 | \hat{Q}_{20}^{(A)} | L0 \rangle$  and  $\Theta_B = \langle 0 | \hat{Q}_{20}^{(B)} | 0 \rangle$ , respectively. For convenience, we report in Table I the analytical forms of the  $5 \times 5$  electrostatic coefficients  $C_5^{\lambda\lambda'}$  in terms of the product  $\Theta_A \Theta_B$ . The numerical results given in Table I correspond to the computed value  $\Theta_A = +2.075$  a.u. for  $S(^1D)$  (details of the calculation are given in Sec. III-B) and the value  $\Theta_B = +0.481$  a.u. selected from the literature [1] for  $H_2$ .

TABLE I: Long-range non-zero electrostatic coefficients  $C_5^{\lambda\lambda'}$  (in atomic units) for the  $S(^1D) + H_2(X^1\Sigma_g^+)$  interaction.

| $\lambda$ | $\lambda'$ | $C_5^{\lambda\lambda'}$ (analytic) | $C_5^{\lambda\lambda'}$ |
|-----------|------------|------------------------------------|-------------------------|
| 0         | 0          | $6 \Theta_A \Theta_B$              | 5.988                   |
| $\pm 1$   | $\pm 1$    | $3 \Theta_A \Theta_B$              | 2.994                   |
| $\pm 2$   | $\pm 2$    | $-6 \Theta_A \Theta_B$             | -5.988                  |
| 0         | $\pm 1$    | $-2 \Theta_A \Theta_B$             | -1.996                  |
| 0         | $\pm 2$    | $-1 \Theta_A \Theta_B$             | -0.998                  |
| $\pm 1$   | 0          | $2 \Theta_A \Theta_B$              | 1.996                   |
| $\pm 1$   | $\mp 1$    | $-\sqrt{3/2} \Theta_A \Theta_B$    | -1.222                  |
| $\pm 1$   | $\pm 2$    | $-2\sqrt{6} \Theta_A \Theta_B$     | -4.889                  |
| $\pm 2$   | 0          | $-1 \Theta_A \Theta_B$             | -0.998                  |
| $\pm 2$   | $\pm 1$    | $2\sqrt{6} \Theta_A \Theta_B$      | 4.889                   |

## II. LONG-RANGE DISPERSION ENERGIES

The dispersion interaction between the dipole-induced moments of  $S(^1D)$  and  $H_2(X^1\Sigma_g^+)$  can also be written as a  $5 \times 5$  potential matrix

$$V_{\lambda,\lambda'}^{\text{disp}}(R, \theta) = -\frac{1}{R^6} \sum_{k=0,2} C_{6,k}^{\lambda\lambda'} C_{k,\lambda'-\lambda}(\theta, 0), \quad (2)$$

where  $C_{6,0}^{\lambda\lambda'}$  and  $C_{6,2}^{\lambda\lambda'}$  are the isotropic and anisotropic dispersion coefficients, respectively. According to Eqs. 16 and 17 of the Appendix and the use of the Wigner-Eckart theorem, the whole set of dispersion coefficients can be derived from the knowledge of the parallel and perpendicular components of the dynamic dipole polarizabilities associated with  $H_2$  and each atomic substate of definite symmetry. The results given in Table II correspond to the computed values of the dynamic polarizabilities for  $S(^1D)$  (see details in Sec. III-B) and the values selected from the literature [2] for  $H_2$ .

TABLE II: Long-range non-zero dispersion coefficients  $C_{6,k}^{\lambda\lambda'}$  (in atomic units) for the  $S(^1D) + H_2(X^1\Sigma_g^+)$  interaction.

| $\lambda$ | $\lambda'$ | $k$ | $C_{6,k}^{\lambda\lambda'}$ |
|-----------|------------|-----|-----------------------------|
| 0         | 0          | 0   | 38.897                      |
| $\pm 1$   | $\pm 1$    | 0   | 39.618                      |
| $\pm 2$   | $\pm 2$    | 0   | 41.779                      |
| 0         | 0          | 2   | 3.668                       |
| $\pm 1$   | $\pm 1$    | 2   | 3.907                       |
| $\pm 2$   | $\pm 2$    | 2   | 4.625                       |
| 0         | $\pm 1$    | 2   | 0.159                       |
| 0         | $\pm 2$    | 2   | 0.159                       |
| $\pm 1$   | 0          | 2   | -0.159                      |
| $\pm 1$   | $\mp 1$    | 2   | 0.195                       |
| $\pm 1$   | $\pm 2$    | 2   | 0.391                       |
| $\pm 2$   | 0          | 2   | 0.159                       |
| $\pm 2$   | $\pm 1$    | 2   | -0.391                      |

- [1] D. Spelsberg, T. Lorenz, and W. Meyer, *J. Chem. Phys.* **99**, 7845 (1993).  
[2] D. M. Bishop and J. Pipin, *J. Chem. Phys.* **97**, 3375 (1992).
